# Supplementary material
Source: PubMed Central journal article supplement (PMC10336737)
Supplement: NIHMS1909747-supplement-Appendix_I.pdf [file NIHMS1909747-supplement-Appendix_I.pdf]

| <b>Appendix 1. Illness Severity and Perinatal Outcomes Dependent on Vaccination Status</b> |                                  |                                     |                |                                   |                                                                     |                                                                       |
|--------------------------------------------------------------------------------------------|----------------------------------|-------------------------------------|----------------|-----------------------------------|---------------------------------------------------------------------|-----------------------------------------------------------------------|
|                                                                                            | <b>Omicron Vaccinated (n=61)</b> | <b>Omicron Unvaccinated (n=163)</b> | <b>P-value</b> | <b>Delta Unvaccinated (n=152)</b> | <b>P-value (comparing omicron vaccinated to delta unvaccinated)</b> | <b>P-value (comparing omicron unvaccinated to delta unvaccinated)</b> |
| Disease severity                                                                           |                                  |                                     | 0.042          |                                   | <0.001                                                              | <0.001                                                                |
| Asymptomatic                                                                               | 22 (36.1)                        | 86 (52.8)                           |                | 31 (20.4)                         |                                                                     |                                                                       |
| Mild-Moderate                                                                              | 37 (60.7)                        | 75 (46.0)                           |                | 83 (54.6)                         |                                                                     |                                                                       |
| Severe-Critical                                                                            | 2 (3.3)                          | 2 (1.2)                             |                | 38 (25.0)                         |                                                                     |                                                                       |
| Received pharmacologic treatment <sup>2</sup>                                              | 4 (6.6)                          | 2 (1.2)                             | 0.048          | 50 (32.9)                         | <0.001                                                              | <0.001                                                                |
| Required respiratory support <sup>3</sup>                                                  | 3 (4.9)                          | 2 (1.2)                             | 0.13           | 42 (27.8)                         | <0.001                                                              | <0.001                                                                |
| Intubation                                                                                 | 0 (0.0)                          | 1 (0.6)                             | >0.99          | 21 (13.8)                         | 0.002                                                               | <0.001                                                                |
| ECMO                                                                                       | 0 (0.0)                          | 0 (0.0)                             | -              | 4 (2.6)                           | 0.58                                                                | 0.05                                                                  |
| VTE                                                                                        | 0 (0.0)                          | 0 (0.0)                             | -              | 7 (4.6)                           | 0.20                                                                | 0.006                                                                 |
| Maternal death                                                                             | 0 (0.0)                          | 0 (0.0)                             | -              | 3 (2.0)                           | 0.56                                                                | 0.11                                                                  |
| <b>Patients who required delivery</b>                                                      | <b>(n=12)</b>                    | <b>(n=65)</b>                       |                | <b>(n=57)</b>                     |                                                                     |                                                                       |
| Cesarean birth                                                                             | 6 (50.0)                         | 20 (30.8)                           | 0.21           | 28 (49.1)                         | 0.96                                                                | 0.038                                                                 |
| Indication for cesarean: worsening maternal status                                         | 0 (0.0)                          | 1 (5.0)                             | >0.99          | 14 (50.0)                         | 0.031                                                               | <0.001                                                                |
| Preterm birth < 37 weeks                                                                   | 1 (8.3)                          | 16 (24.6)                           | 0.28           | 34 (59.7)                         | 0.001                                                               | <0.001                                                                |
| Delivery GA (weeks)                                                                        | 38.2 ± 1.2                       | 36.1 ± 5.2                          | 0.007          | 33.6 ± 5.6                        | <0.001                                                              | 0.011                                                                 |
| NICU admission                                                                             | 3 (25.0)                         | 22 (35.5)                           | 0.74           | 31 (58.5)                         | 0.036                                                               | 0.014                                                                 |
| Delivery complications                                                                     |                                  |                                     |                |                                   |                                                                     |                                                                       |
| Preeclampsia                                                                               | 3 (25.0)                         | 16 (24.6)                           | >0.99          | 13 (23.6)                         | >0.99                                                               | 0.90                                                                  |
| Abruptio                                                                                   | 0 (0.0)                          | 0 (0.0)                             | -              | 1 (1.8)                           | >0.99                                                               | 0.46                                                                  |
| PPH                                                                                        | 2 (16.7)                         | 2 (3.1)                             | 0.11           | 7 (12.7)                          | 0.66                                                                | 0.08                                                                  |
| Transfusion                                                                                | 2 (16.7)                         | 4 (6.2)                             | 0.23           | 10 (18.2)                         | >0.99                                                               | 0.041                                                                 |
| Stillbirth                                                                                 | 0 (0.0)                          | 2 (3.1)                             | >0.99          | 2 (3.5)                           | >0.99                                                               | >0.99                                                                 |
| Neonatal positive SARS-CoV-2 test <sup>4</sup>                                             | 0 (0.0)                          | 0 (0.0)                             | -              | 1 (2.0)                           | >0.99                                                               | 0.45                                                                  |

<sup>1</sup>Disease severity based on the NIH guidelines and categorized by the Metz study  
<sup>2</sup>Treatment includes azithromycin, cephalosporins, remdesivir, dexamethasone or convalescent plasma  
<sup>3</sup>Respiratory support included any form of supplemental oxygen (nasal cannula, high flow, bipap, and intubation)  
<sup>4</sup>Positive neonatal SARS-CoV-2 test within 48 hours of deliver  
ECMO=extracorporeal membrane oxygenation, ICU=intensive care unit, VTE=venous thromboembolism, GA=gestational age, PPH=postpartum hemorrhage, NICU=neonatal intensive care unit

Seasely AR, Blanchard CT, Arora N, Battarbee AN, Casey BN, Dionne-Odom J, et al. Maternal and perinatal outcomes associated with the omicron variant of severe acute respiratory syndrome coronavirus 2 (SARS-CoV-2) infection. *Obstet Gynecol* 2022;140. The authors provided this information as a supplement to their article.  
©2022 American College of Obstetricians and Gynecologists.
